# 1 Development and validation of a methodology to 2 measure exhaled carbon dioxide (CO<sub>2</sub>) and control 3 indoor air renewal

4 **Marta Baselga**<sup>1</sup>, **Juan J. Alba**<sup>1,2</sup>, and **Alberto J. Schuhmacher**<sup>1,3,\*</sup>

5 <sup>1</sup> Institute for Health Research Aragon (IIS Aragón), 50009 Zaragoza Spain; <sup>2</sup> Department of Mechanical En-  
6 gineering, University of Zaragoza, 50018 Zaragoza, Spain; <sup>3</sup> Fundación Agencia Aragonesa para la Investi-  
7 gación y el Desarrollo (ARAID), 50018 Zaragoza, Spain. \* **Correspondence:** [ajimenez@iisaragon.es](mailto:ajimenez@iisaragon.es)

## 8 **Abstract:**

9 The measurement of CO<sub>2</sub> has positioned itself as a low-cost and straightforward  
10 technique to indirectly control indoor air quality, allowing the reduction of the  
11 concentration of potentially pathogen-loaded aerosols to which we are exposed.  
12 However, on numerous occasions, bad practice limits the technique for CO<sub>2</sub> level  
13 interpreting and does not apply methodologies that guarantee air renewal. This work  
14 proposes a new methodology for measuring and controlling CO<sub>2</sub> levels for indoor air in  
15 shared spaces. The proposed methodology is based on three stages: diagnosis,  
16 correction protocols, and monitoring/control/surveillance (MCS). The procedure is  
17 explained using a cultural center as an actual base case study. Additionally, the  
18 procedure was validated by implementing 40 voluntary commercial spaces in Zaragoza  
19 (Spain). Standardization of methods is suggested so that the measurement of CO<sub>2</sub>  
20 becomes an effective strategy to control the airborne transmission of pathogens and  
21 thus prevent future Covid-19 outbreaks and novel pandemics.

## 22 **Keywords**

23 Carbon dioxide; CO<sub>2</sub>; infectious diseases; environmental engineering; covid-19; airborne

## 24 **1. Introduction**

25 Since the global acceptance of the transmission of COVID-19 by aerosols,<sup>1</sup> numerous  
26 strategies have been developed to prevent air quality degradation by different means. It is  
27 possible to differentiate between air renewal and air purification strategies. On the one  
28 hand, renewal techniques evaluate and optimize air renewal in closed spaces. On the other  
29 hand, purification methods are varied and struggle to eliminate potential airborne  
30 pathogens. Although both strategies share the common goal of reducing the airborne  
31 spreading of respiratory diseases, air purification is seriously handicapped because it  
32 usually requires higher economic investments (e.g., bipolar ionization systems, UV-C  
33 radiation devices), and its efficacy has been poorly tested against SARS-CoV-2. As an  
34 exception, high-efficiency portable air cleaners (e.g., HEPA filters) are presented as an  
35 affordable, high-performance method that can filter up to 99.9% of submicron particles and  
36 reduce SARS-CoV-2 aerial viral viral viral load up to 80%.<sup>2,3</sup> However, in actual operating  
37 conditions, it is necessary to consider the workflow of the equipment and its location to take  
38 advantage of its performance.

**NOTE: This preprint reports new research that has not been certified by peer review and should not be used to guide clinical practice.**

39 Ideally, measuring aerosols would allow knowing the quality of the air and estimating the  
40 risk of contagion. Nevertheless, the direct measurement of aerosols is highly complex and  
41 expensive since it requires specialized equipment. To overcome these hurdles, the carbon  
42 dioxide (CO<sub>2</sub>) measurement has been suggested as an indirect indicator of the risk of  
43 respiratory infectious diseases transmission.<sup>4</sup> The measure of exhaled CO<sub>2</sub> was proposed  
44 before the pandemic to control the airborne spread of diseases since it represents a greater  
45 probability of breathing air previously inhaled by other people.<sup>5</sup> Consequently, the indoor  
46 CO<sub>2</sub> measurement is suggested as a reasonable ventilation proxy. It is possible to determine  
47 what percentage of the exhaled air by another individual ( $y$ ) according to the expression  
48  $y = C_e x + C_a(1 - x)$ . Where,  $C_e$  corresponds to the concentration of CO<sub>2</sub> in exhaled air  
49 (estimated at 40,000 ppm),  $C_a$  to the ambient CO<sub>2</sub> concentration and  $x$  to the fraction of  
50 exhaled air. For instance, assuming a basal value of 440 ppm (fresh air outdoors), which  
51 increases indoors up to 2,000 ppm, the approximate percentage of air that those individuals  
52 have already breathed will be 3.9 %.

53 One of the significant limitations of CO<sub>2</sub> level measurement is that it cannot be directly  
54 related to the concentration of aerosols in the environment since the generation of  
55 bioaerosols depends on the type of respiratory activity.<sup>6</sup> For example, aerosols generated  
56 during sustained vocalization (e.g., singing) are not comparable to those generated during  
57 silent breathing.<sup>7-10</sup> Nevertheless, CO<sub>2</sub> concentration limits have been proposed to reduce  
58 COVID-19 transmission, usually between 700 and 1,000 ppm, regardless of the event.<sup>11,12</sup>

59 SARS-CoV-2 is mainly spread over time and distance. An average of  $3.1 \pm 2.9$  copies/L of air  
60 viral load average is deduced from a total of 313 samples.<sup>13-35</sup> It has been established that  
61 close contact transmission is predominant, while fomites and aerosols explain special  
62 propagation events in punctual events, according to CDC guidelines.<sup>36</sup> The massive  
63 infections associated with superspreading represent a scenario of complex epidemiological  
64 management. To date, superspreading events have only been reported indoors.<sup>28,37-55</sup> Due  
65 to the difficulty of discriminating between superspreaders and non-spreaders,<sup>28,56</sup> it is  
66 imperative to improve air quality in public and shared spaces. By implementing the proper  
67 measures, it is possible to reduce cases of respiratory diseases in the community and  
68 prevent future pandemics with devastating effects.

69 Many countries have implemented CO<sub>2</sub> measurement as a standard in different spaces,  
70 such as shopping centers,<sup>57</sup> collective transport,<sup>58-61</sup> workspaces,<sup>62</sup> or university and school  
71 classrooms.<sup>62-67</sup> Beyond research projects, some governments have decided to bet on  
72 scientific criteria and invest resources to mitigate contagion among the population. For  
73 example, the U.K. government distributed more than 300,000 CO<sub>2</sub> meters in its schools to  
74 optimize air renewal during classes.<sup>68</sup> In Germany, a global approach was also carried out,  
75 investing more than €17M to guarantee the presence of meters in schools.<sup>69</sup> An investment  
76 of \$350 billion for state and local governments has recently been reported and \$122 billion  
77 for schools, which can support making ventilation and air filtration upgrades in the U.S. to  
78 reduce the respiratory pathogens spreading.<sup>70</sup>

79 However, there are still no standardized methodologies for measuring and controlling CO<sub>2</sub>.  
80 "Aireamos" (in Spanish, it refers to "renewing air"),<sup>71,72</sup> as an international independent  
81 scientific working group, has been a pioneer in developing the bases for measurement,

82 making available to the population a set of valuable tools and resources to control the  
83 renewal of indoor air. However, there is still no straightforward procedure for intervening  
84 in public and shared spaces. Before the pandemic, CO<sub>2</sub> measurement was mainly explored  
85 in school settings. Numerous investigations pointed to an improvement in the pupil's  
86 concentration in well-ventilated classrooms.<sup>73-75</sup>

87 This article proposes a new methodology for effectively measuring and controlling CO<sub>2</sub> in  
88 closed and shared spaces. The methodology is based on three stages: diagnosis, correction,  
89 and controlled monitoring. The methodology allows us to interpret the air renewal patterns  
90 and estimate if the renewal is appropriate to the activity and type of space. Additionally, this  
91 method has been validated as a pilot project in a 3-floors building with multiple teaching  
92 rooms and cultural activities and a subset of 40 local businesses in Zaragoza (Spain).

## 93 **2. Materials and Methods**

### 94 **2.1. General description of the methodology**

95 A methodology based on three standard stages with specific goals was developed. They  
96 enumerate as follows:

- 97 a) Diagnosis. It is intended to acquire detailed knowledge on how CO<sub>2</sub> concentration  
98 levels vary within the physical limits of the shared space and what is its time evolution  
99 as a function of specific activities carried out in the shared space. The initial diagnosis  
100 includes a description of the space indicating the measures of the shared space (e.g.,  
101 size, volume, and architectural geometry), other CO<sub>2</sub> sources (e.g., gas stove), the  
102 presence and ubication of windows and doors, as well as the availability of Heating,  
103 Ventilation, and Air Conditioning (HVAC) systems and hoods. During this process, it is  
104 necessary to identify the "person in charge" and perform minimal instruction about  
105 the project and concepts such as air renewal, ventilation, metabolic CO<sub>2</sub>, and how to  
106 measure it.
- 107 b) Correction. According to the acquired knowledge in the diagnosis stage, it is possible  
108 to proceed with the design of customized protocols and procedures to improve the air  
109 renovation that will imply variations in the CO<sub>2</sub> concentration. The CO<sub>2</sub> levels will be  
110 monitored with a CO<sub>2</sub> meter to avoid trespassing a defined threshold considered as a  
111 low-risk level by the scientific community.
- 112 c) Monitoring, control, and surveillance (MCS): Continuous monitoring of CO<sub>2</sub>  
113 concentration is performed to guarantee that the shared space is always kept at low-  
114 risk levels. In case of the CO<sub>2</sub> concentration levels reach the maximum level, an alert is  
115 issued so that people in charge of the shared space activate the protocols and  
116 procedures defined in the previous stage to fix the situation.

117 For each stage, achieving the primary goals depends on specific characteristics of the  
118 shared space, such as main business or social activity, geometrical properties, number and  
119 location of windows and doors, or a maximum number of people sharing the room at the  
120 same time. A case study and a practical application is presented in this article to explain this  
121 methodology.

## 122 2.2. Measurement of metabolic CO<sub>2</sub>

123 Any time measuring metabolic CO<sub>2</sub> levels is required, Aranet CO<sub>2</sub> meters (Aranet Wireless  
124 Solutions España SL, Spain) and Signos CO<sub>2</sub> meters (Signos.io, Spain) will be used. The tech-  
125 nical characteristics of these measuring devices are shown in Table 1.

126

127

**Table 1.** Technical characteristics of Aranet and Signos SIO<sub>2</sub> CO<sub>2</sub> meters.

| <b>Characteristics</b>      | <b>Aranet 4 Pro</b>   | <b>Signos (SiO<sub>2</sub>)</b> |
|-----------------------------|-----------------------|---------------------------------|
| CO <sub>2</sub> measurement | < 9,999 ppm           | < 5,000 ppm                     |
| Temperature measurement     | 0 – 50 °C             | -60 – 80 °C                     |
| Humidity measurement        | 0 – 85 %              | 0 – 95 %                        |
| Atmospheric pressure        | 0.3 – 1.1 atm         | 0.3 – 1.1 atm                   |
| Sensor                      | N-DIR                 | N-DIR                           |
| Sampling frequency          | 1 min                 | 11 min                          |
| Transmission                | Bluetooth (-12–4 dBm) | LoRa                            |
| Precision                   | ± 50 ppm              | ± 50 ppm                        |
| Dimensions / weight         | 70x70x24 mm / 104 g   | 100x100x23 mm / 170 g           |

128

## 129 2.3. The methodology explained in a case study

130 As a case study, the methodology for improving air quality was applied in a cultural center.  
131 The building has 1,200 m<sup>2</sup> divided in three floors (Figure 1a). A 132 m<sup>2</sup> room located in the  
132 basement was selected (Classroom 1, see Figure 1b).

133 a) Diagnosis: The shared spaces were analyzed for four days (February 24<sup>th</sup> to 27<sup>th</sup>, 2021)  
134 by placing 10 CO<sub>2</sub> meters (Aranet 4) in strategic locations, as shown in Figure 1a. A CO<sub>2</sub>  
135 measuring device was placed outdoors so that it was possible to calculate the increase  
136 in CO<sub>2</sub> ( $\Delta CO_2$ ) associated with human activity according to Equation 1; where (CO<sub>2</sub>)<sub>ext</sub>  
137 corresponds to CO<sub>2</sub> outside and (CO<sub>2</sub>)<sub>ind</sub> to CO<sub>2</sub> indoors.

$$138 \Delta CO_2 = (CO_2)_{ind} - (CO_2)_{out} \quad (Equation 1)$$

139 In the first approach, the data showed frequent high CO<sub>2</sub> concentration levels probably  
140 linked to specific activities. Subsequently, the shared spaces were carefully monitored  
141 for six more days (February 27<sup>th</sup> to March 5<sup>th</sup>, 2021) to confirm the hypotheses that  
142 could be made after the initial analysis. This process makes it possible to characterize  
143 the air renewal patterns in each space based on activity and capacity. At least one CO<sub>2</sub>  
144 meter was placed every 20 m<sup>2</sup> at a minimum height of 1.5 m. Ideally, they will be placed  
145 near exhaust fans (to measure a significant air sample) and/or in locations where air  
146 turnover is poor (e.g. corners), and far from windows and doors.

147 b) Correction: Based on the obtained results, an attempt was made to reduce the level of  
148 metabolic CO<sub>2</sub> below 800 ppm. One of the classrooms in the basement of the building  
149 (Classroom 1) showed inefficient ventilation patterns. Dry ice was used to saturate the  
150 room with CO<sub>2</sub> and find effective strategies to improve air renewal. According to Figure  
151 1b, 10 CO<sub>2</sub> meters (Aranet 4) were placed in the classroom to analyze the improvement  
152 of changes in the HVAC and natural ventilation (through doors and windows opening  
153 or closing).

154 c) MCS: This stage was performed until May 15<sup>th</sup>, 2022 using 10 CO<sub>2</sub> meters (Signos).  
 155 Whenever the cultural center exceeds the 800 ppm level for more than 30 minutes, it  
 156 receives a telematic alert or phone call to ask the "person in charge" to correct the  
 157 situation.

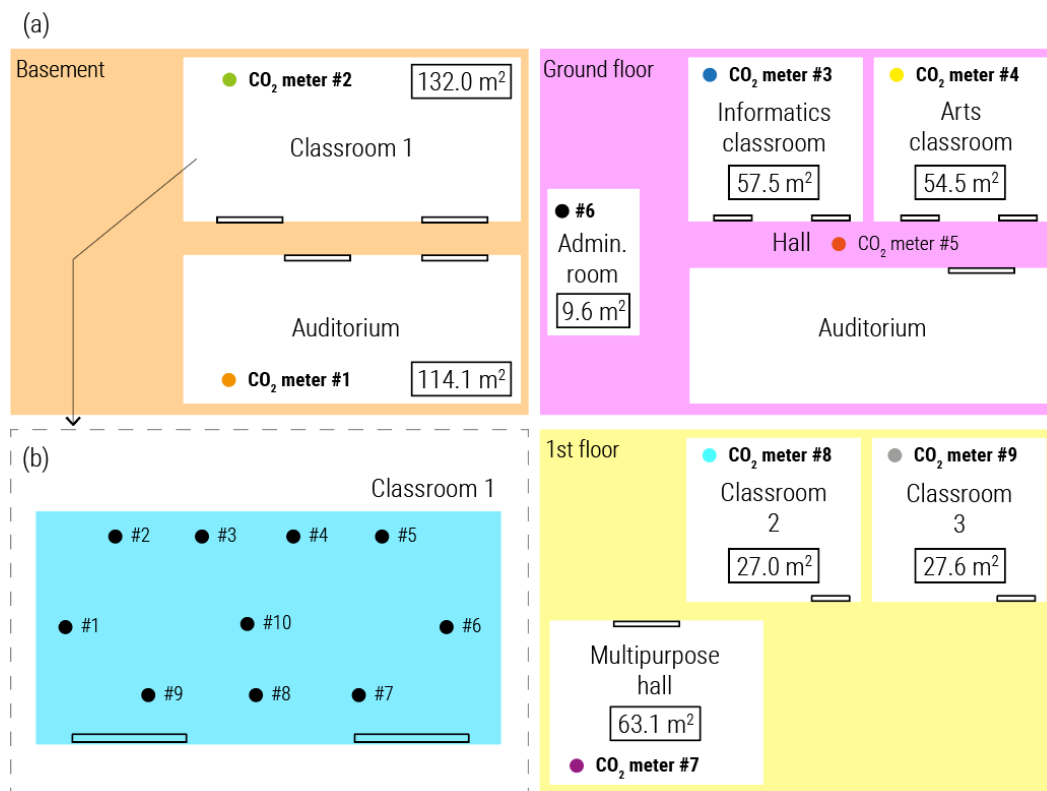

158  
 159 **Figure 1.** (a) General distribution of CO<sub>2</sub> meters in the education building and (b) classroom 1 detail.

160 **2.4. Broader validation in commercial spaces**

161 Subsequently, the method was applied to 40 businesses / retail stores spaces located in  
 162 Zaragoza's city center (Spain). These included: one optician, twelve clothing stores, two  
 163 kids' clothing stores, five shoe stores, two jewelry stores, four food stores, two restaurants,  
 164 five home stores, two consultancies, two dietary and health centers, and two florists. The  
 165 selection of commercial spaces was made to cover different typologies. For example,  
 166 customers spend long periods in restaurants, while their exposure to indoor air in flower  
 167 retailers is minor. Two CO<sub>2</sub> meters were placed in each establishment, except for a kid's  
 168 clothing store, where only one was placed, and another children's clothing store, where  
 169 three were placed.

170 Interventions in shared spaces were carried out following the three phases: diagnosis,  
 171 correction, and MCS.

172 a) Diagnostic. Two CO<sub>2</sub> meters (Aranet 4) devices were placed at strategic points for 2  
 173 or 3 days in each business. These meters were chosen because they record the CO<sub>2</sub>  
 174 level every minute. The CO<sub>2</sub> curves were analyzed during the business hours of each  
 175 establishment. This phase allowed us to know if the sensors took representative  
 176 measurements of the total space and have a global image of the air quality in the  
 177 volume area. The diagnostic process might include the use of risk calculators or

178 methods for simulating disease propagation via aerosols based on the standard  
179 Wells-Riley model for infectious respiratory disease transmission by airborne  
180 particles.<sup>71,72,76</sup>  
181 b) Correction. In spaces where it was necessary (typically presenting CO<sub>2</sub> levels >1,000  
182 ppm for more than 30 minutes), a correction phase was carried out where preventive  
183 measures were implemented to improve indoor air renewal. In most cases, this phase  
184 was superimposed on monitoring to determine the advantage obtained at the time.  
185 c) MCS. The monitoring stage occurred during January and February 2022. For this  
186 stage, CO<sub>2</sub> (Signos) meters were installed in each establishment. These CO<sub>2</sub> meters,  
187 include IoT technology, enabled remote access to streaming data.

### 188 3. Results

#### 189 3.1. The diagnostic stage to allow detection of inefficient air renewals

190 The diagnosis must be performed on a long enough time interval to cover the specific and  
191 regular casuistry of the establishment. For example, in the base case study (cultural center),  
192 the classrooms usually are occupied for daily classes. Therefore, a selection of days where  
193 the classrooms are occupied is sufficient. In this case, four days were used for the  
194 preliminary analysis of the space. Assuming a proper maximum CO<sub>2</sub> level of 800 ppm, a  
195 maximum increase of 400-450 ppm compared to fresh outdoor air was considered  
196 acceptable.

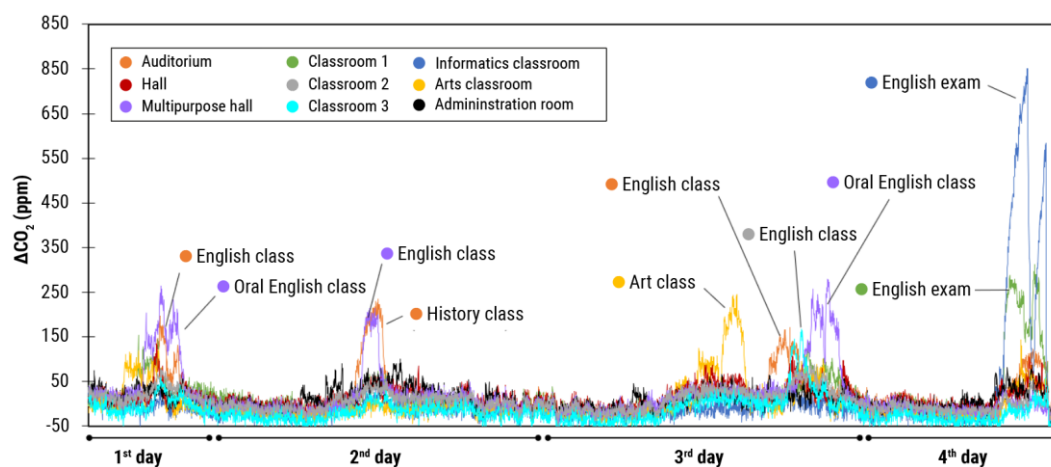

197 **Figure 2.** Increment of CO<sub>2</sub> values recorded in the diagnostic period.

198 As shown in Figure 2, there are peaks in the increment of CO<sub>2</sub> associated with the activity of  
199 each room. Knowing the activity and the number of occupants is essential to interpret the  
200 CO<sub>2</sub> measurements. Determining the ppm/person ratio can be helpful, as we proposed in  
201 previous work (see <sup>61</sup>). This value incorporates the occupancy variable and allows a more  
202 precise definition of the efficiency of air renewal, although it assumes homogeneity in  
203 exhalation between individuals. In addition, it is crucial to request the usual activity in the  
204 space. Those responsible must not consciously increase ventilation (e.g., opening windows)  
205 to avoid underestimating CO<sub>2</sub> measurements. A typical table with essential information is  
206 shown in Table 2. The method to fill in the table must be explained in the training phase  
207 since it is of utmost importance to interpret the data properly later. In the base case, the  
208 room had no open windows, except for the Hall and the Art Classroom. In contrast, all doors  
209 were open during diagnostic measurements.  
210

211

**Table 2.** Example of a data sheet for CO<sub>2</sub> measurements interpretation.

| Day                 | Duration | Activity      | Occupation | Location      | Mean<br>ΔCO <sub>2</sub> | Max<br>ΔCO <sub>2</sub> | Mean<br>ppm/person | Max<br>ppm/per-<br>son |
|---------------------|----------|---------------|------------|---------------|--------------------------|-------------------------|--------------------|------------------------|
| 1 <sup>st</sup> day | 1:30 h   | English class | 8 pax      | Auditorium    | 106 ppm                  | 196 ppm                 | 13.3 ppm           | 24.5 ppm               |
| 2 <sup>nd</sup> day | 2:00 h   | History class | 15 pax     | Auditorium    | 164 ppm                  | 234 ppm                 | 11.0 ppm           | 15.6 ppm               |
| 3 <sup>rd</sup> day | 2:00 h   | English class | 9 pax      | Auditorium    | 116 ppm                  | 170 ppm                 | 12.9 ppm           | 18.9 ppm               |
| 1 <sup>st</sup> day | 1:30 h   | English class | 10 pax     | Classroom 1   | 89 ppm                   | 153 ppm                 | 8.9 ppm            | 15.3 ppm               |
| 3 <sup>rd</sup> day | 2:00 h   | English class | 8 pax      | Classroom 1   | 76 ppm                   | 140 ppm                 | 9.5 ppm            | 17.5 ppm               |
| 4 <sup>th</sup> day | 2:30 h   | English exam  | 18 pax     | Classroom 1   | 219 ppm                  | 312 ppm                 | 12.2 ppm           | 17.3 ppm               |
| 4 <sup>th</sup> day | 4:00 h   | English exam  | 7 pax      | Informatics   | 328 ppm                  | 751 ppm                 | 46.9 ppm           | 107.3 ppm              |
| 2 <sup>nd</sup> day | 3:00 h   | Art class     | 6 pax      | Art classroom | 68 ppm                   | 121 ppm                 | 11.3 ppm           | 20.2 ppm               |
| 3 <sup>rd</sup> day | 1:30 h   | Art class     | 6 pax      | Art classroom | 34 ppm                   | 125 ppm                 | 5.8 ppm            | 20.8 ppm               |
| 3 <sup>rd</sup> day | 3:00 h   | Art class     | 6 pax      | Art classroom | 79 ppm                   | 243 ppm                 | 13.2 ppm           | 40.5 ppm               |
| 3 <sup>rd</sup> day | 2:30 h   | Art class     | 4 pax      | Art classroom | 58 ppm                   | 118 ppm                 | 9.7 ppm            | 19.7 ppm               |
| 1 <sup>st</sup> day | 2:30 h   | English class | 7 pax      | Multi. hall   | 163 ppm                  | 263 ppm                 | 23.3 ppm           | 37.6 ppm               |
| 2 <sup>nd</sup> day | 1:00 h   | English class | 10 pax     | Multi. hall   | 181 ppm                  | 213 ppm                 | 18.1 ppm           | 21.3 ppm               |
| 3 <sup>rd</sup> day | 2:30 h   | English class | 8 pax      | Multi. hall   | 177 ppm                  | 279 ppm                 | 22.2 ppm           | 34.9 ppm               |

212 Comparing the ppm/person indicator in similar activities in different spaces makes it  
 213 possible to determine the relative efficiency of air renewal in each space. For instance, in  
 214 English classes (not oral),  $9.2 \pm 16.4$ ,  $13.1 \pm 21.7$ , and  $18.1 \pm 21.3$  ppm/person were achieved  
 215 in Classroom 1, the Auditorium, and the Multipurpose Room, respectively. It indicates that  
 216 air renewal is similar in all rooms, although slightly improved in Classroom 1. On the  
 217 contrary, disparate ratios were obtained in the Cambridge exams in Classroom 1 and the  
 218 Informatics Classroom. While in Classroom 1, the ratio was  $12.2 \pm 17.3$  ppm/person, in the  
 219 Informatics Classroom, a  $46.9 \pm 107.3$  ppm/person was found. Again, this indicates more  
 220 efficient air renewal inside the basement room.

221 Some gaps may go unnoticed during the diagnostic phase. Due to the atmospheric  
 222 conditions or the activity during the diagnosis, the CO<sub>2</sub> levels may be decreased. Although  
 223 we recommend analyzing 3-4 critical days, subsequent days (e.g., 5-6 days) should be closely  
 224 monitored to ensure representative results. For example, in the base case, on the  
 225 monitoring days after diagnosis, higher CO<sub>2</sub> concentrations were recorded in Classroom 1  
 226 than in other areas, even in similar conditions of capacity and activity.

### 227 **3.2. Interpretation of CO<sub>2</sub> measurements, methods to correct gaps, and** 228 **monitoring**

229 After detecting spaces that can be improved, it is necessary to implement efficient corrective  
 230 measures that guarantee adequate air renewal. First, it is crucial to interpret the  
 231 measurements and begin to rule out possibilities. In the case of Classroom 1, the following  
 232 hypotheses were prepared:

- 233 • Hypothesis 1. The activities studied in the initial diagnosis were not representative,  
 234 and the high activity in the classroom, so more CO<sub>2</sub> is exhaled. Then, the following  
 235 12 English classes in Classroom 1, comprising the months of April to June, were  
 236 analyzed. In the studied activities, no significant increase in CO<sub>2</sub> was observed,

237 except for the classes held in June, where an increase of 522 ppm was reached.  
238 Figure 3 shows the evolution of average CO<sub>2</sub> from April to June, showing an increase  
239 in concentration in the latter month. However, CO<sub>2</sub> exhalation in the records studied  
240 is similar, so this hypothesis is ruled out.  
241

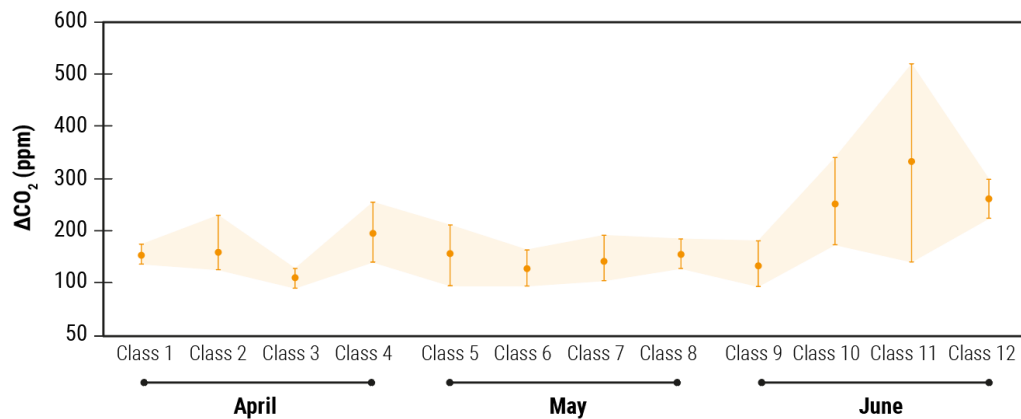

242  
243

**Figure 3.** Evolution of average ΔCO<sub>2</sub> in English classes from April to June.

- 244
- 245 • Hypothesis 2. The weather conditions of the initial diagnosis were favorable for air  
246 renewal ratios. The weather influence on the ventilation ratios was evaluated by  
247 analyzing the incidences (values above 800 ppm for more than 30 minutes)  
248 recorded from April to July (regardless of the activity carried out). Of the 13  
249 incidences found, 46 % (6) came from July, while 31 % (4) came from June, and the  
250 remaining 23% (3) from May. The climatic variation has affected the ventilation  
251 performance of the space. Working on days with less favorable weather will be  
252 necessary to test the corrective measures.
  - 253 • Testing corrective measures. An experiment where the space was saturated with  
254 CO<sub>2</sub> using dry ice was conducted, stabilized as a function of the amount evaporated.  
255 Two scenarios were evaluated with an activated HVAC system: with and without  
256 opening doors. Figure 4 shows the results obtained. With doors closed, it takes  
257 ~1,600 ppm ~37 minutes to reduce the CO<sub>2</sub> concentration to ~800 ppm, at 22  
258 ppm/minute. While, with doors open, the reduction from ~1,600 ppm to ~800 ppm  
259 occurs in ~17 minutes, at 47 ppm/minute. The opening of doors with the HVAC  
260 system active supposes a remarkable improvement of the ventilation in this  
261 classroom.  
262 In addition, this method helps calculate actual air changes per hour (ACH) in space.  
263 The HVAC flow in Classroom 1 is 750 m<sup>3</sup>/s. For a volume of 363 m<sup>3</sup> corresponding to  
264 the space, a theoretical ACH of 2.06 (door closed) is estimated. An ACH of 4.42 (with  
265 opened doors) and 2.03 (closed doors) has been determined by dry ice tests. It  
266 suggests that the tests have been carried out correctly and that the opening of the  
267 doors represents a considerable improvement in air renewal compared to the  
268 closed space.

268 Sometimes, the subsequent monitoring phase can be used to assess the benefit of  
269 the corrective actions imposed. In the base case, opening doors in Classroom 1 was  
270 enough to achieve adequate air renewal, even in the summer months. Ideally,  
271 during monitoring, it would be necessary to implement a system that alerts those



272 responsible for the space if the established CO<sub>2</sub> limits are exceeded. This strategy  
273 allows for preventing possible incidents and correcting CO<sub>2</sub> levels exceeded in  
274 streaming, thus, guaranteeing adequate air quality.

275

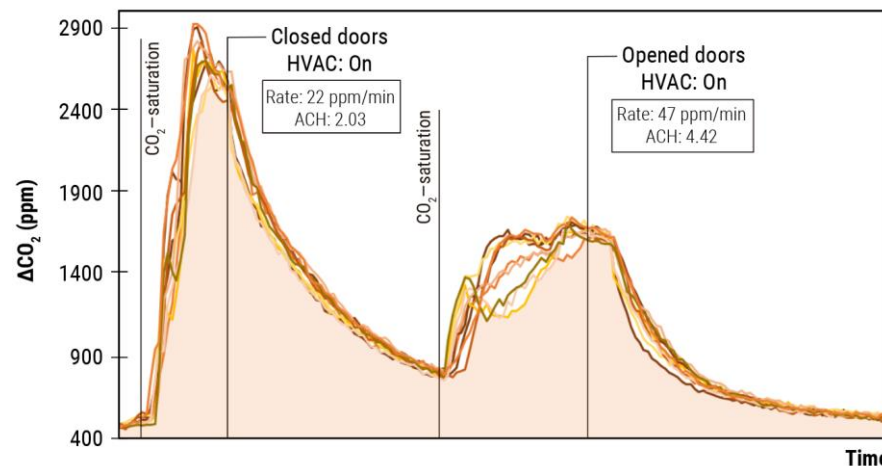

276

277

**Figure 4.** Results of the experiment with dry ice in Classroom 1, with and without open doors.

278

### 279 3.3. Applying and validating the method in local businesses

280 To perform a broader application of the methodology to diagnose, correct, and monitor CO<sub>2</sub>  
281 we performed a study in 40 retail stores. To this end we modified the phases to meet the  
282 pre-established requirements, and the absolute CO<sub>2</sub> concentration was measured (instead  
283 of the outdoor-indoor CO<sub>2</sub> increase). In addition, the ppm/person indicator could not be  
284 used since the businesses could not provide a continuous record of the occupancy.

285 Initially, a preliminary characterization (diagnosis) of the participant businesses was  
286 conducted. 23 businesses with CO<sub>2</sub> values above the maximum recommended (800 ppm)  
287 were identified. Eight of them did not require specific follow-up interventions as they were  
288 minimal and discrete increases. The other 15 participants were subjected to an exhaustive  
289 evaluation that served to design and implement a series of prevention measures that had  
290 to be implemented to improve air recirculation in the commercial spaces.

291 The implementation of corrective measures was modified from the original approach.  
292 Instead of *in-situ* experimenting, it was decided to assess the improvement of the proposed  
293 measures throughout the MCS stages. Thus, we evaluate the air renewal patterns from  
294 week to week. In our case, it was enough to agree on the terms with each person in charge  
295 through fortnight reports and phone calls. The presented strategy allowed us to reduce the  
296 costs of the project and to be able to evaluate several stores at the same time.

297 In the period studied (January-February 2022), the average CO<sub>2</sub> of all businesses was 547 ±  
298 87 ppm in the first fortnight of January, 559 ± 86 ppm in the second fortnight of January, 531  
299 ± 82 ppm in the first fortnight of February, and 529 ± 89 in the second half of January (Figure  
300 5a). Substantial differences were observed according to the type of store, as shown in Figure  
301 5b. Specifically, the highest CO<sub>2</sub> peaks were observed in Kids' clothing stores (691 ± 209 ppm  
302 with maximums of 2,297 ppm). It may be associated with a limited opening of doors or  
303 windows to maintain the thermal comfort of the children. In contrast, florists reported the

304 lowest CO<sub>2</sub> levels (mean of 466 ± 47 ppm with a maximum of 874 ppm), possibly due to  
 305 customers' reduced time during service.  
 306

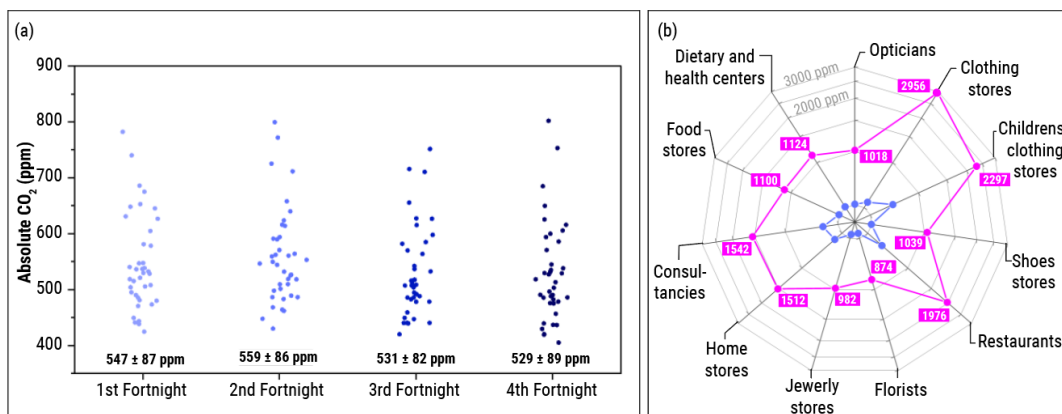

307  
 308 **Figure 5.** (a) Mean of CO<sub>2</sub> value (inbox) of all businesses based on the fortnight and (b) mean of CO<sub>2</sub>  
 309 and maximum measurement depending on the type of business where the mean value (blue) and  
 310 the maximum values (pink label) are shown.

311

312 A total of 15 businesses were selected for exhaustive monitoring. Among them, only five  
 313 agreed to implement the corrective measures. The following sections describe the evolution  
 314 of 3 establishments under the three typical scenarios:

315 1. Retail stores with good starting air quality. Initially, 17 shops showed a renewal of  
 316 the air appropriate to the architecture of the space and the type of activity carried  
 317 out. Three cases are shown below as an example.

318 *Example 1)* In a shoe store, the limit of 800 ppm was not exceeded during the  
 319 recorded period (Figure 6a). Specifically, it obtained an average CO<sub>2</sub> value of 441 ±  
 320 42 ppm, reaching a maximum value of 776 ppm.

321 *Example 2)* A food store was kept below 800 ppm (Figure 6b). Despite the large influx  
 322 of customers, the levels maintained an average of 454 ± 39 ppm, reaching a  
 323 maximum value of 782 ppm

324 *Example 3)* In one of the clothing stores, the maximum established by the scientific  
 325 community of 800 ppm was not exceeded (Figure 6c). On average, it reached a value  
 326 of 469 ± 33 ppm, reaching a maximum value of 783 ppm.

327 2. Businesses with improvable air quality that did not implement corrective actions.  
 328 Of the 23 stores that showed levels above 800 ppm during the first week, only 15 of  
 329 them did so continuously and with values above 900 ppm. The remaining eight  
 330 stores were recommended to maximize the frequency of opening doors and  
 331 windows. This section shows the evolution of CO<sub>2</sub> in a business that refused to  
 332 establish the proposed corrective measures.

333 *Example 1)* On average, a clothing store reached a value of 709 ± 295 ppm, reaching  
 334 a maximum of 2956 ppm (Figure 6d).

335 *Example 2)* A restaurant establishment reached an average value of 589 ± 139 ppm,  
 336 reaching a maximum value of 1976 ppm (Figure 6e).

337 *Example 3)* The mean of CO<sub>2</sub> in a children's clothing store was 762 ± 229 ppm,  
 338 reaching a maximum of 2297 ppm (Figure 6f).

339 3. Spaces with improvable air quality that implemented corrective actions. After  
340 implementing the prevention measures (especially the reinforcement of natural  
341 ventilation), the reduction of CO<sub>2</sub> in the establishments was substantial. Three cases  
342 are described below. The values of the first weeks concerning the final weeks are  
343 comparable, given that similar trends and averages are observed in the previous  
344 section.

345 *Example 1)* In a clothing shop, the mean of CO<sub>2</sub> was reduced from 605 ± 78 ppm  
346 (maximum of 1100 ppm) to 529 ± 78 ppm (745 ppm) after trying different measures.  
347 The increase in the frequency of door opening (Figure 6g) was more effective in the  
348 fourth fortnight. In this period, no values over 800 ppm were registered.

349 *Example 2)* CO<sub>2</sub> levels on average were reduced from 536 ± 89 ppm (maximum of  
350 1001 ppm) to 485 ± 51 ppm (714 ppm) from the third fortnight in a food store, as  
351 shown in Figure 6h.

352 *Example 3)* In a shoe store, the mean of CO<sub>2</sub> was reduced from 528 ± 67 ppm  
353 (maximum of 946 ppm) to 473 ± 45 ppm (764 ppm). Although, at one point, 800 ppm  
354 was exceeded (Figure 6i).

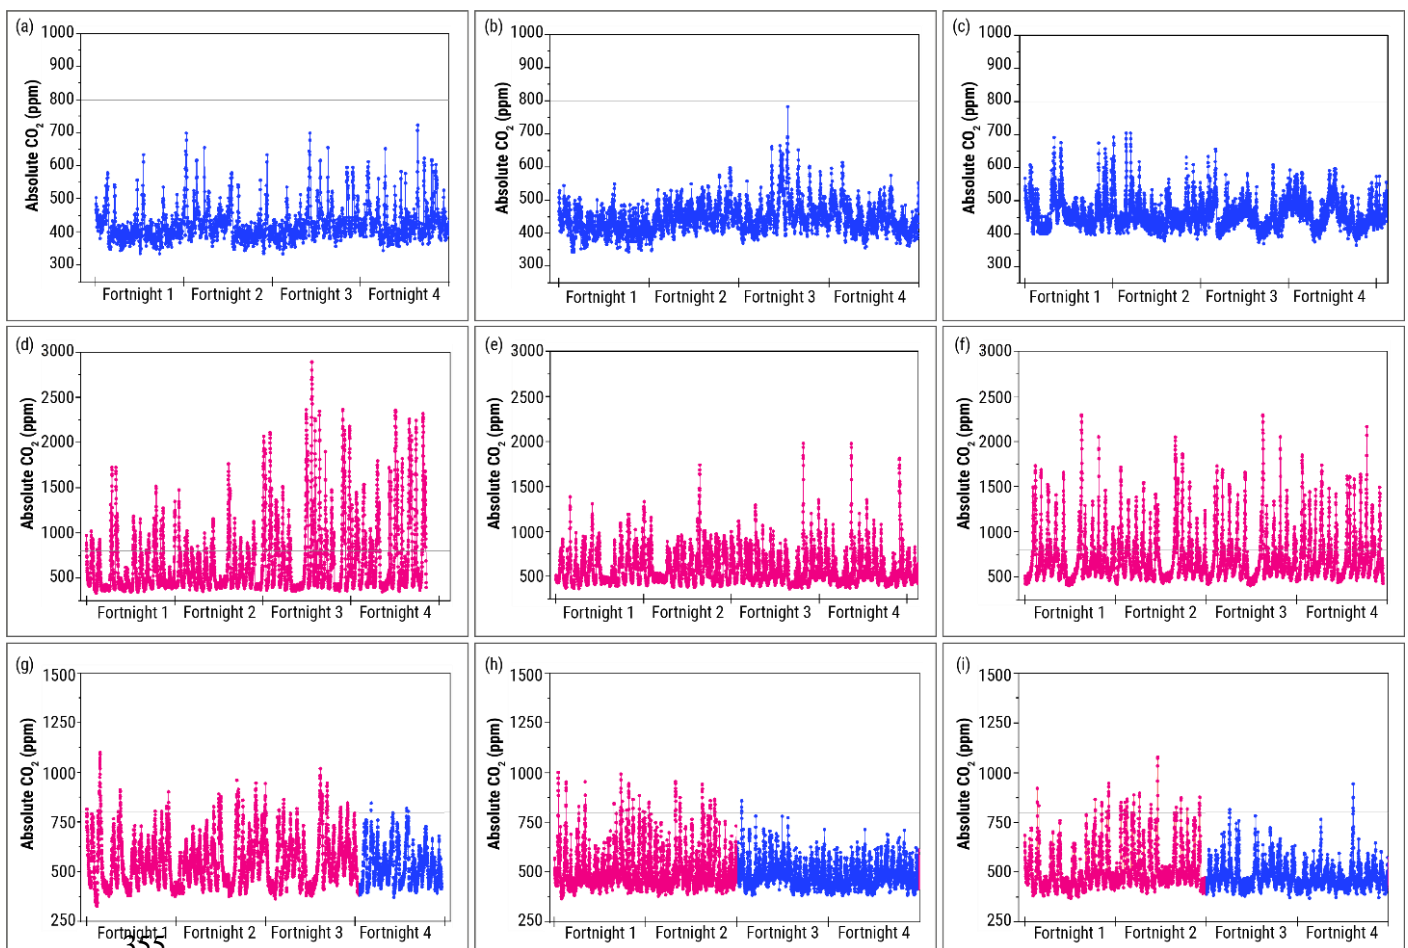

356 **Figure 6.** Evolution of CO<sub>2</sub> levels in the monitoring period (January-February 2022) in (a-c) businesses  
357 with good starting air quality, (d-f) businesses with improvable air quality that did not implement cor-  
358 rective measures, and (g-i) businesses with improvable air quality that implemented corrective actions.  
359 The pink dots indicate the CO<sub>2</sub> curves of stores with poor air renewal, while the blue dots represent  
360 CO<sub>2</sub> curves of establishments with good air renewal.

361

## 4. Conclusions

362 This work presents and discusses a new methodology for measuring CO<sub>2</sub> in shared spaces  
363 based on diagnosis, correction, and MCS (monitoring-control and surveillance phases). This  
364 methodology was validated in a subset of 40 local businesses in Zaragoza (Spain). The  
365 COVID-19 pandemic has pointed to the need to rethink the epidemiological control tech-  
366 niques. In particular, the increasing knowledge on airborne transmission of diseases makes  
367 it imperative to implement new public health strategies that guarantee that air quality fol-  
368 lows specific standards. If the incorporation of these strategies proves effective, it will be  
369 possible to prevent numerous respiratory affections and potential new pandemics.

370 Briefly, the methodology can be sequenced in three stages:

- 371 1. Diagnosing. After training the responsible person, the diagnostic phase was carried  
372 out. A first assessment of the shared space is made by placing CO<sub>2</sub> meters for a time  
373 interval long enough to address the maximum possible casuistry. Usually, 3 or 4 busi-  
374 ness days is enough. Ideally, placing more than 1 CO<sub>2</sub> meter will let us know if the  
375 measurement represents the space. Additionally, it will bring preliminary -but no de-  
376 finitive- information about how the air renewal occurs in the shared space. After an  
377 in-depth analysis of the evolution of CO<sub>2</sub> levels in the diagnosis phase, it is necessary  
378 to follow up in subsequent days (typically 6 or 7 days) to ensure that the diagnosis is  
379 representative of the space.
- 380 2. Correcting. Poor air renewal must be identified once an exhaustive analysis of the  
381 space has been carried out. Based on current scientific knowledge, a criterion of not  
382 exceeding 800 ppm for more than 20-30 minutes may be valuable. After detecting  
383 these incidences, it is necessary to look for the cause of the problem. It is helpful to  
384 raise possible hypotheses and try to rule them out to propose efficient corrective  
385 measures. Ideally, these proposed measures can be validated by conducting experi-  
386 ments (e.g., saturating with CO<sub>2</sub> and analyzing the advantage of each one) or carrying  
387 out a detailed follow-up in the monitoring phase. Note that this phase can be per-  
388 formed linearly (e.g., after diagnosis), or it can also be implemented during monitor-  
389 ing if necessary.
- 390 3. MCS. A monitoring and follow-up phase is crucial to warn of any incident where the  
391 CO<sub>2</sub> limit is exceeded. It is the only strategy that guarantees that good indoor air  
392 quality. It is possible that, in spaces where natural ventilation influences the space air  
393 renewal, the CO<sub>2</sub> concentration fluctuates depending on the weather. In these cases,  
394 it may be necessary to re-implement the correction phase to maintain an adequate  
395 air renewal. Ideally, an alert system can be valuable for the monitored center, allow-  
396 ing it to prevent the accumulation of CO<sub>2</sub> or modulate the capacity and, ultimately,  
397 correct the situation.

398 The results obtained from the validation in 40 retail stores in the center of Zaragoza (Spain)  
399 suggest that it is possible to implement measures that favor the renewal of shared air  
400 quickly. Opening doors and windows is one of the most straightforward and immediate  
401 methods applied in almost any situation. We have shown that the methodology is practical  
402 and can reduce the risk of transmission of respiratory diseases by aerosols by increasing air  
403 renovation. We hope this work contributes to laying the methodological foundations for  
404 CO<sub>2</sub> measurement to become a valuable, standardized, and guaranteed tool.

## 405 Acknowledgments

406 We would like to express our gratitude to "Fundación Ibercaja" and "Federación de  
407 Empresarios de Comercio y Servicios de Zaragoza (ECOS Zaragoza)" for supporting this  
408 research and their invaluable collaboration. We thank Signos.io for help and support with  
409 the CO<sub>2</sub> meters. We also would like to thank "Ayuntamiento de Zaragoza" and "Instituto de  
410 Investigación Sanitaria Aragón" for the received support.

## 411 Conflict of Interest

412 The authors declare no competing financial interest.

## 413 References

- 414 1. Lewis BD. Why the WHO took two years to say COVID is airborne. *Nature*. 2022;604:26–31.
- 415 2. Rodríguez M, Palop ML, Seseña S, Rodríguez A. Are the Portable Air Cleaners (PAC) really effective to  
416 terminate airborne SARS-CoV-2? *Sci Total Environ*. 2021;785:147300. 2021.  
417 <https://doi.org/10.1016/j.scitotenv.2021.147300>.
- 418 3. Liu DT, Philips KM, Speth MM, Besser G, Mueller CA, Sedaghat AR. Portable HEPA Purifiers to  
419 Eliminate Airborne SARS-CoV-2: A Systematic Review. *Otolaryngol - Head Neck Surg (United States)*.  
420 2021:1–8.
- 421 4. Peng Z, Jimenez JL. Exhaled CO<sub>2</sub> as a COVID-19 infection risk proxy for different indoor environments  
422 and activities. *Environ Sci Technol Lett*. 2021;8:392–397.
- 423 5. Rudnick S, Milton D. Risk of indoor airborne infection transmission estimated from carbon dioxide  
424 concentration. *Indoor Air*. 2003;13:237–45.
- 425 6. Kappelt N, Russell HS, Kwiatkowski S, Afshari A, Johnson MS. Correlation of respiratory aerosols and  
426 metabolic carbon dioxide. *Sustain*. 2021;13:1–11.
- 427 7. Shao S, Zhou D, He R, et al. Risk assessment of airborne transmission of COVID-19 by asymptomatic  
428 individuals under different practical settings. *J Aerosol Sci*. 2021;151:105661. 2021.  
429 <https://doi.org/10.1016/j.jaerosci.2020.105661>.
- 430 8. Fabian P, Brain J, Houseman E, Gern J, Milton D. Origin of exhaled breath particles from healthy and  
431 human rhinovirus-infected subjects. *J Aerosol Med Pulm Drug Deliv*. 2011;24:137–47.
- 432 9. Wang CC, Prather KA, Sznitman J, et al. Airborne transmission of respiratory viruses. *Science (80- )*.  
433 2021;373:eabd9149.
- 434 10. Johnson GR, Morawska L, Ristovski ZD, et al. Modality of human expired aerosol size distributions. *J*  
435 *Aerosol Sci*. 2011;42:839–851.
- 436 11. Ingenieros Industriales de Aragón y la Rioja C, Ayuntamiento de Zaragoza A. *Guía de Referencia*  
437 *Covid.*; 2021. Available on: [http://www.zaragoza.es/contenidos/coronavirus/guia-referencia-](http://www.zaragoza.es/contenidos/coronavirus/guia-referencia-covid.pdf)  
438 [covid.pdf](http://www.zaragoza.es/contenidos/coronavirus/guia-referencia-covid.pdf) (accessed on June 11th 2022).
- 439 12. Cheng SY, Wang CJ, Shen ACT, Chang SC. How to Safely Reopen Colleges and Universities During  
440 COVID-19: Experiences From Taiwan. *Ann Intern Med*. 2020;173:638–641.
- 441 13. Liu Y, Ning Z, Chen Y, et al. Aerodynamic analysis of SARS-CoV-2 in two Wuhan hospitals. *Nature*.  
442 2020;582:557–560.
- 443 14. Stern RA, Koutrakis P, Martins MAG, et al. Characterization of hospital airborne SARS-CoV-2. *Respir*  
444 *Res*. 2021;22:1–8. 2021. <https://doi.org/10.1186/s12931-021-01637-8>.
- 445 15. Department of Infectious Disease, Imperial College London, London, UK W 1PG. EVALUATION OF  
446 SARS-CoV-2 AIR CONTAMINATION IN HOSPITALS WITH CORIOLIS  $\mu$  AIR SAMPLER / CONTEXT /  
447 PROTOCOL / RESULTS / CUSTOMER / CONCLUSION. 2020. Available on: [https://www.bertin-](https://www.bertin-instruments.com/wp-content/uploads/2020/08/CORM-026-039-B-SARS-CoV-2-in-hospitals-1.pdf)  
448 [instruments.com/wp-content/uploads/2020/08/CORM-026-039-B-SARS-CoV-2-in-hospitals-1.pdf](https://www.bertin-instruments.com/wp-content/uploads/2020/08/CORM-026-039-B-SARS-CoV-2-in-hospitals-1.pdf)  
449 (accessed on June 11th 2022)
- 450 16. Mallach G, Kasloff SB, Kovesi T, et al. Aerosol SARS-CoV-2 in hospitals and long-term care homes

- 451 during the COVID-19 pandemic. *PLoS One*. 2021;16:1–17. 2021.  
452 <http://dx.doi.org/10.1371/journal.pone.0258151>.
- 453 17. Winslow RL, Zhou J, Windle E.F., et al. SARS-CoV-2 environmental contamination from hospitalised  
454 COVID-19 patients receiving aerosol generating procedures. *Thorax*. 2021:thoraxjnl-2021-218035.
- 455 18. Kenarkoohi A, Noorimotlagh Z, Falahi S, Amarloei A, Abbas S. Hospital indoor air quality monitoring  
456 for the detection of SARS-CoV-2 (COVID-19) virus. *Sci Total Environment*. 2020;748:141324.
- 457 19. Ma J, Qi X, Chen H, et al. Exhaled breath is a significant source of SARS-CoV-2 emission. *medRxiv*.  
458 2020: <https://doi.org/10.1101/2020.05.31.20115154>.
- 459 20. Styczynski A, Hemlock C, Hoque KI, et al. Ventilation and detection of airborne SARS-CoV-2:  
460 elucidating high-risk spaces in naturally ventilated healthcare settings. *medRxiv*.  
461 2021:2021.06.30.21258984. 2021.  
462 <https://www.medrxiv.org/content/10.1101/2021.06.30.21258984v1>.
- 463 21. Moore G, Rickard H, Stevenson D, et al. Detection of SARS-CoV-2 within the healthcare environment:  
464 a multi-centre study conducted during the first wave of the COVID-19 outbreak in England. *J Hosp*  
465 *Infect*. 2021;108:189–196. 2021. <https://doi.org/10.1016/j.jhin.2020.11.024>.
- 466 22. Dumont-Leblond N, Veillette M, Mubareka S, et al. Low incidence of airborne SARS-CoV-2 in acute  
467 care hospital rooms with optimized ventilation. *Emerg Microbes Infect*. 2020;9:2597–2605.
- 468 23. Song ZG, Chen YM, Wu F, et al. Identifying the Risk of SARS-CoV-2 Infection and Environmental  
469 Monitoring in Airborne Infectious Isolation Rooms (AIIRs). *Virology*. 2020;35:785–792. 2020.  
470 <https://doi.org/10.1007/s12250-020-00301-7>.
- 471 24. Nissen K, Krambrich J, Akaberi D, et al. Long-distance airborne dispersal of SARS-CoV-2 in COVID-19  
472 wards. *Sci Rep*. 2020;10:1–9. 2020. <https://doi.org/10.1038/s41598-020-76442-2>.
- 473 25. Ding Z, Qian H, Xu B, et al. Toilets dominate environmental detection of severe acute respiratory  
474 syndrome coronavirus 2 in a hospital. *Sci Total Environ*. 2021;753:141710. 2021.  
475 <https://doi.org/10.1016/j.scitotenv.2020.141710>.
- 476 26. Moreno T, Pintó RM, Bosch A, et al. Tracing surface and airborne SARS-CoV-2 RNA inside public buses  
477 and subway trains. *Environ Int*. 2021;147:106326.
- 478 27. Barbieri P, Zupin L, Licen S, et al. Molecular detection of SARS-CoV-2 from indoor air samples in  
479 environmental monitoring needs adequate temporal coverage and infectivity assessment. *Environ*  
480 *Res*. 2021;198:111200.
- 481 28. Baselga M, Güemes A, Alba JJ, Schuhmacher AJ. SARS-CoV-2 Droplet and Airborne Transmission  
482 Heterogeneity. *J Clin Med*. 2022;11:2607.
- 483 29. Lednicky J, Shankar S, Elbadry M, et al. Collection of SARS-CoV-2 Virus from the Air of a Clinic Within  
484 a University Student Health Care Center and Analyses of the Viral Genomic Sequence. *Aerosol Air*  
485 *Qual Res*. 2020;20:1167–71.
- 486 30. Chia PY, Coleman KK, Tan YK, et al. Detection of air and surface contamination by SARS-CoV-2 in  
487 hospital rooms of infected patients. *Nat Commun*. 2020;11:2800.
- 488 31. Chen GM, J.I. J.J., Jiang S, et al. Detecting Environmental Contamination of Acute Respiratory  
489 Syndrome Coronavirus 2 (SARS-CoV-2) in Isolation Wards and Fever Clinics\*. *Biomed Environ Sci*.  
490 2020;33:943–947.
- 491 32. Santarpia JL, Rivera DN, Herrera VL, et al. Aerosol and surface contamination of SARS-CoV-2 observed  
492 in quarantine and isolation care. *Sci Rep*. 2020;10:1–8. 2020. <https://doi.org/10.1038/s41598-020-69286-3>.
- 494 33. Zhou AJ, Otter JA, Price J.R., et al. Investigating SARS-CoV-2 surface and air contamination in an acute  
495 healthcare 2 setting during the peak of the COVID-19 pandemic in London. *Clin Infect Dis*.  
496 2021;73:7:e1870-e1877.
- 497 34. Lei H, Ye F, Liu X, et al. SARS-CoV-2 Environmental Contamination Associated with Persistently  
498 Infected COVID-19 Patients. *Influenza Other Respir Viruses*. 2020. 14:6:688-699.
- 499 35. Gomes P, Gonçalves J, Isabel A, et al. Evidence of Air and Surface Contamination with SARS-CoV-2 in  
500 a Major Hospital in Portugal. 2022.
- 501 36. Centers for Disease Control and Prevention C. Scientific Brief: SARS-CoV-2 Transmission. Available

- 502 on: [https://www.cdc.gov/coronavirus/2019-ncov/more/scientific-brief-](https://www.cdc.gov/coronavirus/2019-ncov/more/scientific-brief-sars-cov-2.html) sars-cov-2.html e-  
503 [briefs%2Fscientific-brief-sars-cov-2.html](https://www.cdc.gov/coronavirus/2019-ncov/more/scientific-brief-sars-cov-2.html) (accessed June 11 2022).
- 504 37. Shim E, Tariq A, Choi W, Lee Y, Chowell G. Transmission potential and severity of COVID-19 in South  
505 Korea. *Int J Infect Dis.* 2020;93:339–344. 2020. <https://doi.org/10.1016/j.ijid.2020.03.031>.
- 506 38. Park SY, Kim YM, Yi S, et al. Coronavirus disease outbreak in call center, South Korea. *Emerg Infect*  
507 *Dis.* 2020;26:1666–1670.
- 508 39. Fontanet A, Tondeur L, Madec Y, et al. Cluster of COVID-19 in Northern France: A Retrospective  
509 Closed Cohort Study. *SSRN Electron J.* 2020:1–22.
- 510 40. MOH. News Highlights. Available on:  
511 [http://web.archive.org/web/20200420074230/https://www.moh.gov.sg/news-](http://web.archive.org/web/20200420074230/https://www.moh.gov.sg/news-highlights/details/16-more-cases-discharged-35-new-cases-of-covid-19-infection-confirmed)  
512 [highlights/details/16-more-cases-discharged-35-new-cases-of-covid-19-infection-confirmed](http://web.archive.org/web/20200420074230/https://www.moh.gov.sg/news-highlights/details/16-more-cases-discharged-35-new-cases-of-covid-19-infection-confirmed)  
513 (accessed June 11th 2022).
- 514 41. Cai J, Sun W, Huang J, Gamber M, Wu J, He G. Indirect Virus Transmission in Cluster of COVID-19  
515 Cases, Wenzhou, China, 2020. *Emerg Infect Dis.* 2020;26:1343–1345.
- 516 42. Chu J, Yang N, Wei Y, et al. Clinical characteristics of 54 medical staff with COVID-19: A retrospective  
517 study in a single center in Wuhan, China. *J Med Virol.* 2020;92:807–813.
- 518 43. Sim W. Japan identifies 15 clusters as Covid-19 cases. *The Straits Times.* Available on:  
519 [http://web.archive.org/web/20200420073241/https://www.straitstimes.com/asia/east-asia/japan-](http://web.archive.org/web/20200420073241/https://www.straitstimes.com/asia/east-asia/japan-identifies-15-clusters-as-covid-19-cases-mount)  
520 [identifies-15-clusters-as-covid-19-cases-mount](http://web.archive.org/web/20200420073241/https://www.straitstimes.com/asia/east-asia/japan-identifies-15-clusters-as-covid-19-cases-mount) (accessed June 11th 2022).
- 521 44. Aljazeera. After one infected 16 at Berlin nightclub, coronavirus fears grow. Available on:  
522 [http://web.archive.org/web/20200420071353/https://www.aljazeera.com/news/2020/03/infected-](http://web.archive.org/web/20200420071353/https://www.aljazeera.com/news/2020/03/infected-16-berlin-nightclub-coronavirus-fears-grow-200310132859234.html)  
523 [16-berlin-nightclub-coronavirus-fears-grow-200310132859234.html](http://web.archive.org/web/20200420071353/https://www.aljazeera.com/news/2020/03/infected-16-berlin-nightclub-coronavirus-fears-grow-200310132859234.html) (accessed on June 11th 2022).
- 524 45. Marcelo P, O'brien M. Cluster of coronavirus cases tied to U.S. Biotech Meeting. Available on:  
525 [http://web.archive.org/web/20200401222019/https://time.com/5801554/coronavirus-cluster-](http://web.archive.org/web/20200401222019/https://time.com/5801554/coronavirus-cluster-biotech-biogen-boston-cambridge/)  
526 [biotech-biogen-boston-cambridge/](http://web.archive.org/web/20200401222019/https://time.com/5801554/coronavirus-cluster-biotech-biogen-boston-cambridge/) (accessed on June 11th 2022).
- 527 46. Orban A. 26 passengers tested positive for Covid-19 on an Emirates flight to Hong Kong. *Aviation 24.*  
528 Available on: [https://www.aviation24.be/airlines/emirates-airline/26-passengers-tested-positive-](https://www.aviation24.be/airlines/emirates-airline/26-passengers-tested-positive-on-an-emirates-flight-to-hong-kong/)  
529 [on-an-emirates-flight-to-hong-kong/](https://www.aviation24.be/airlines/emirates-airline/26-passengers-tested-positive-on-an-emirates-flight-to-hong-kong/) (accessed June 11th 2022).
- 530 47. Shen Y, Li C, Dong H, et al. Community Outbreak Investigation of SARS-CoV-2 Transmission among  
531 Bus Riders in Eastern China. *JAMA Intern Med.* 2020;180:1665–1671.
- 532 48. Zauzmer J. 'Take it very seriously': Pastor at Arkansas church where 34 people came down with  
533 coronavirus sends a warning. *The Washington Post.* Available on:  
534 [http://web.archive.org/web/20200420073657/https://www.washingtonpost.](http://web.archive.org/web/20200420073657/https://www.washingtonpost.com/religion/2020/03/24/pastor-arkansas-church-coronavirus-warning-greers-ferry/)  
535 [com/religion/2020/03/24/pastor-arkansas-church-coronavirus-warning-greers-ferry/](http://web.archive.org/web/20200420073657/https://www.washingtonpost.com/religion/2020/03/24/pastor-arkansas-church-coronavirus-warning-greers-ferry/) (accessed  
536 June 11th 2022)
- 537 49. McKie R. Did singing together spread coronavirus to four choirs? *The Guardian.* Available on:  
538 [https://www.theguardian.com/world/2020/may/17/did-singing-together-spread-coronavirus-to-](https://www.theguardian.com/world/2020/may/17/did-singing-together-spread-coronavirus-to-four-choirs)  
539 [four-choirs](https://www.theguardian.com/world/2020/may/17/did-singing-together-spread-coronavirus-to-four-choirs) (accessed June 11th 2022).
- 540 50. Dashboard of the COVID-19 Virus Outbreak in Singapore. Available on:  
541 [http://web.archive.org/web/20200420073524/https://www.againstcovid19.com/singapore?start=2](http://web.archive.org/web/20200420073524/https://www.againstcovid19.com/singapore?start=21-01-2020&end=20-04-2020)  
542 [1-01-2020&end=20-04-2020](http://web.archive.org/web/20200420073524/https://www.againstcovid19.com/singapore?start=21-01-2020&end=20-04-2020) (accessed June 11th 2022)
- 543 51. Adam DC, Wu P, Wong JY, et al. Clustering and superspreading potential of SARS-CoV-2 infections in  
544 Hong Kong. *Nat Med.* 2020;26:1714–1719. 2020. <http://dx.doi.org/10.1038/s41591-020-1092-0>.
- 545 52. D.W. Coronavirus: German slaughterhouse outbreak crosses. Available on:  
546 <https://www.dw.com/en/coronavirus-german-slaughterhouse-outbreak-crosses-1000/a-53883372>  
547 (accessed on June 11th 2022).
- 548 53. Cannon A. Spike in COVID-19 cases in Iowa packing plants a big part of 389 new cases, state's largest  
549 single-day increase. *Des Moines Register.* Available on:  
550 [https://eu.desmoinesregister.com/story/news/2020/04/19/coronavirus-iowa-largest-single-day-](https://eu.desmoinesregister.com/story/news/2020/04/19/coronavirus-iowa-largest-single-day-increase-iowa-covid-19-cases-tied-meatpacking-plants/5162127002/)  
551 [increase-iowa-covid-19-cases-tied-meatpacking-plants/5162127002/](https://eu.desmoinesregister.com/story/news/2020/04/19/coronavirus-iowa-largest-single-day-increase-iowa-covid-19-cases-tied-meatpacking-plants/5162127002/) (accessed June 11th 2022).
- 552 54. Adebayo B. A Worker Infected 533 Others With Coronavirus at a Factory in Ghana, President Says.

- 553 Available on: [https://edition.cnn.com/2020/05/11/africa/ghana-factory-coronavirus-infection-](https://edition.cnn.com/2020/05/11/africa/ghana-factory-coronavirus-infection-intl/index.html)  
554 [intl/index.html](https://edition.cnn.com/2020/05/11/africa/ghana-factory-coronavirus-infection-intl/index.html) (accessed June 11th 2022).
- 555 55. Halliday J. Over 450 Covid-19 cases reported at food factories in England and Wales. *The Guardian*.  
556 Available on: [https://www.theguardian.com/uk-news/2020/jun/25/over-450-covid-19-cases-](https://www.theguardian.com/uk-news/2020/jun/25/over-450-covid-19-cases-reported-at-food-factories-in-england-and-wales)  
557 [reported-at-food-factories-in-england-and-wales](https://www.theguardian.com/uk-news/2020/jun/25/over-450-covid-19-cases-reported-at-food-factories-in-england-and-wales) (accessed June 11th 2022).
- 558 56. Sneppen K, Taylor RJ, Simonsen L. Impact of superspreaders on dissemination and mitigation of  
559 COVID-19. *Proc Natl Acad Sci*. 2020. <https://doi.org/10.1101/2020.05.17.20104745>.
- 560 57. Ryukyu A, Haeburu H, Ono K. Providing Visualized Information on "Safety and Security" Installation  
561 of CO<sub>2</sub> Concentration Monitors for Customers at Aeon Stores. 2021. Available online:  
562 [https://www.aeondelight.co.jp/english/news/20210901\\_installation-of-co2-concentration-](https://www.aeondelight.co.jp/english/news/20210901_installation-of-co2-concentration-monitors-for-customers-at-aeon-stores.pdf)  
563 [monitors-for-customers-at-aeon-stores.pdf](https://www.aeondelight.co.jp/english/news/20210901_installation-of-co2-concentration-monitors-for-customers-at-aeon-stores.pdf) (accessed on 27 May 2022).
- 564 58. Querol X, Alastuey A, Moreno N, et al. How can ventilation be improved on public transportation  
565 buses? Insights from CO<sub>2</sub> measurements. *Environ Res*. 2022;205:112451.
- 566 59. Woodward H, Fan S, Bhagat RK, et al. Air flow experiments on a train carriage—Towards  
567 understanding the risk of airborne transmission. *Atmosphere (Basel)*. 2021;12:1267.
- 568 60. Salthammer T, Fauck C, Omelan A, Wientzek S, Uhde E. Time and spatially resolved tracking of the  
569 air quality in local public transport. *Sci Rep*. 2022;12:1–9. 2022. [https://doi.org/10.1038/s41598-022-](https://doi.org/10.1038/s41598-022-07290-5)  
570 [07290-5](https://doi.org/10.1038/s41598-022-07290-5).
- 571 61. Baselga M, Alba JJ, Schuhmacher AJ. The Control of Metabolic CO<sub>2</sub> in Public Transport as a Strategy  
572 to Reduce the Transmission of Respiratory Infectious Diseases. 2022:1–20.
- 573 62. Bazant MZ, Kodio O, Cohen AE, Khan K, Gu Z, Bush JWM. Monitoring carbon dioxide to quantify the  
574 risk of indoor airborne transmission of COVID-19. *Flow*. 2021;1:1–18.
- 575 63. Chillon SA, Millan M, Aramendia I, Fernandez-Gamiz U, Zulueta E, Mendaza-Sagastizabal X. Natural  
576 ventilation characterization in a classroom under different scenarios. *Int J Environ Res Public Health*.  
577 2021;18.
- 578 64. Zhang D, Ding E, Bluysen PM. Guidance to assess ventilation performance of a classroom based on  
579 CO<sub>2</sub> monitoring. *Indoor Built Environ*. 2022;31:4:1107-1126.
- 580 65. McNeill VF, Corsi R, Huffman JA, et al. Room-level ventilation in schools and universities. *Atmos*  
581 *Environ X*. 2022;13.
- 582 66. Avella F, Gupta A, Peretti C, et al. Low-Invasive CO<sub>2</sub>-based visual alerting systems to manage natural  
583 ventilation and improve IAQ in historic school buildings. *Heritage*. 2021;4:3442–3468.
- 584 67. Zivelonghi A, Lai M. Mitigating aerosol infection risk in school buildings: the role of natural  
585 ventilation, volume, occupancy and CO<sub>2</sub> monitoring. *Build Environ*. 2021;204:29:108139.
- 586 68. GOV.UK. All schools to receive carbon dioxide monitors. Available on:  
587 <https://www.gov.uk/government/news/all-schools-to-receive-carbon-dioxide-monitors> (accessed  
588 June 11th 2022).
- 589 69. Dutch News. All classrooms to get a CO<sub>2</sub> meter as part of ventilation package. Available on:  
590 [https://www.dutchnews.nl/news/2022/02/all-classrooms-to-get-a-co2-meter-as-part-of-](https://www.dutchnews.nl/news/2022/02/all-classrooms-to-get-a-co2-meter-as-part-of-ventilation-package/)  
591 [ventilation-package/](https://www.dutchnews.nl/news/2022/02/all-classrooms-to-get-a-co2-meter-as-part-of-ventilation-package/) (accessed June 11th 2022).
- 592 70. The White House. Biden Administration Launches Effort to Improve Ventilation and Reduce the  
593 Spread of COVID-19 in Buildings. Available on: [https://www.whitehouse.gov/briefing-](https://www.whitehouse.gov/briefing-room/statements-releases/2022/03/17/fact-sheet-biden-administration-launches-effort-to-improve-ventilation-and-reduce-the-spread-of-covid-19-in-buildings/)  
594 [room/statements-releases/2022/03/17/fact-sheet-biden-administration-launches-effort-to-](https://www.whitehouse.gov/briefing-room/statements-releases/2022/03/17/fact-sheet-biden-administration-launches-effort-to-improve-ventilation-and-reduce-the-spread-of-covid-19-in-buildings/)  
595 [improve-ventilation-and-reduce-the-spread-of-covid-19-in-buildings/](https://www.whitehouse.gov/briefing-room/statements-releases/2022/03/17/fact-sheet-biden-administration-launches-effort-to-improve-ventilation-and-reduce-the-spread-of-covid-19-in-buildings/) (accessed June 11<sup>th</sup> 2022).
- 596 71. Aireamos. Aireamos Home. Available on: [www.aireamos.org](http://www.aireamos.org) (accessed June 11th 2022).
- 597 72. Aireamos Covid Risk Airborne. Available on: <https://www.aireamos.org/herramienta/> (accessed  
598 June 11th 2022).
- 599 73. Bogdanovica S, Zemitis J, Bogdanovics R. The effect of CO<sub>2</sub> concentration on children's well-being  
600 during the process of learning. *Energies*. 2020;13:6099.
- 601 74. Bartyzel J, Zieba D, Necki J, Zimnoch M. Assessment of ventilation efficiency in school classrooms  
602 based on indoor-outdoor particulate matter and carbon dioxide measurements. *Sustain*.



- 603 2020;12:5600.
- 604 75. Muelas Á, Remacha P, Pina A, et al. Analysis of different ventilation strategies and CO2 distribution  
605 in a naturally ventilated classroom. *Atmos Environ.* 2022;283:119176.
- 606 76. Wells WF. Airborne Contagion and Air Hygiene; an Ecological Study of Droplet Infections. *JAMA.*  
607 1955:159:90.
- 608
